# Supplementary material for: Entropic Control of an Excited Folded-Like Conformation in a Disordered Protein Ensemble
Source: PubMed Central journal article supplement (PMC6166778; doi:10.1016/j.jmb.2018.06.008), 2018-06-07
Supplement: NIHMS78248-supplement-Supporting_Information.pdf [file NIHMS78248-supplement-Supporting_Information.pdf]

## **Supporting Information**

### **Entropic Control of an Excited Folded-Like Conformation in a Disordered Protein Ensemble**

Sneha Munshi, Divya Rajendran & Athi N. Naganathan\*

Department of Biotechnology, Bhupat & Jyoti Mehta School of Biosciences, Indian Institute of Technology Madras (IITM), Chennai 600036, India.

e-mail: [athi@iitm.ac.in](mailto:athi@iitm.ac.in)

## Supporting Methods

**Protein Expression, Purification, Equilibrium Unfolding and Binding Studies** The purification of CytR DBD and all the equilibrium experiments were performed employing identical protocols to that detailed in a recent work.<sup>1</sup>

Briefly, the equilibrium fluorescence experiments were performed in a Chirascan Plus qCD instrument (Applied Photophysics Ltd., UK) by exciting  $\sim 20\text{-}26\ \mu\text{M}$  of CytR in  $10 \times 10\ \text{mm}$  pathlength cuvette at 274 nm and collecting the emission spectra between 280 and 400 nm. The quantum yields were estimated with NATA as a reference (0.13 at 298 K in water). The binding isotherms were generated by exciting Alexa-532 at 530 nm (labeled at the 5'-end of the 14-mer *udp* half-site) and collecting the emission at 580 nm following a 5-minute equilibration for every point in a Chirascan Plus qCD instrument (Applied Photophysics Ltd., UK) equipped with a fluorescence polarization accessory.

**Kinetic Measurements** The temperature dependent conformational relaxation in the disorderd CytR native ensemble was monitored by fluorescence in a Chirascan SF.3 Stopped Flow instrument (Applied Photophysics Ltd., UK; deadtime  $\sim 2$  milliseconds) coupled to a thermostated water bath. A  $200\ \mu\text{M}$  protein solution was denatured in 20 mM sodium phosphate (pH 7.0; native buffer) containing 4 M urea. Refolding was initiated by mixing the protein in urea with the native buffer in a 1:10 ratio (protein:buffer). The relaxation traces were recorded by exciting the sole tyrosine in CytR (Y53) with a 280 nm LED. The total fluorescence was recorded by a PMT detector and the scattered photons were filtered out by placing a 295 nm cut-off filter. Kinetic traces were recorded from 278 to 303 K at an interval of 2.5 K. At each temperature, 6 repeats were recorded while allowing for an equilibration of one minute after every repeat.

**Wako-Saitô-Muñoz-Eaton (WSME) Model** WSME model invokes an Ising-like treatment to generate protein conformational states (microstates or species) by assuming that each residue can sample two phases, folded (represented by binary variable  $1$ ) and unfolded (binary variable  $0$ ), resulting in an ensemble of  $2^N$  states for a  $N$ -residue protein.<sup>2,3</sup> The total partition function, partial partition functions, free energy profiles and residue probabilities were calculated as explained in several other works.<sup>2,4-7</sup> The only difference between the simulations employed in the current work and that before<sup>8</sup> is that a sequence-dependent conformational entropy is employed wherein the entropic penalty for fixing P33 in a native conformation is assumed to be zero for CytR. The final paramters that reproduce the unfolding curves are given in Table T1.

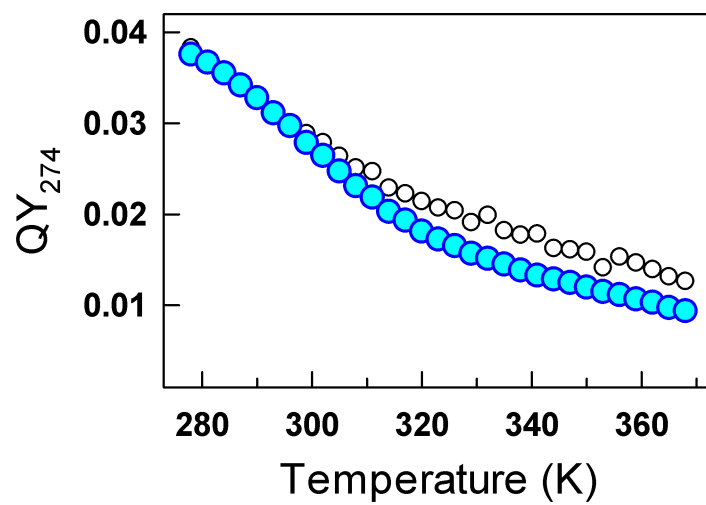

**Figure S1** QY of Y53 under native conditions (cyan; 20 mM sodium phosphate buffer, pH 7.0) and in the presence of 6 M urea (black).

```

      10      20      30      40      50      60      70
CytR  MKAKKQETAATMKDVALKAKVSTATVSRALM--NPDKV SQATRNRVEKAAAREVGYLPQPMGRNVKRNE--
LacR  MKP-----VTLYDVAEYAGVSYQTVSRVVN---QASHVSAKTREKVEAAMAELNYIPNRVAQQLAGKQSL
PurR  -----MATIKDVAKRANVSTTTVSHVIN---KTRFVAEETRNAVWAAIKELHYSPSAVARSLKVN---
FurR  MK-----LDEIARLAGVSRRTTASYVINGKAKQYRVSDKTVEKVMVAVVREHNYHPNAVAAGLRA----
CcpA  MN-----VTIYDVAREASVSMATVSRVVN---GNPPNVKPSTRKKVLETIERLGYRPNVAVARGLAS----
DtxR  MKDLVDTTEMYLRTIYELEEEGVTPLRARIA---ERLEQSGPTVSQTVARMERDGLVVVASDRSLQMT---

```

**Figure S2** Multiple sequence alignment of CytR homologs. The position 33 (as per CytR numbering scheme) is highlighted in red. Note that only CytR has a proline at position 33 while the others do not.

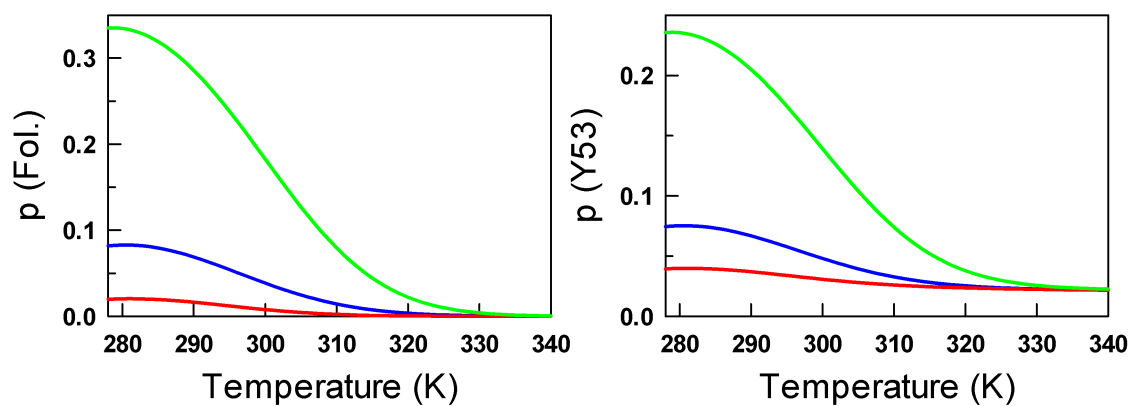

**Figure S3** WSME model predictions for CytR (blue), CytR + 0.5 M TMAO (green) and CytR P33A (red). (Left Panel) Population of the folded state. (Right panel) The probability of a folded-like environment for Y53 derived from the partial partition functions.

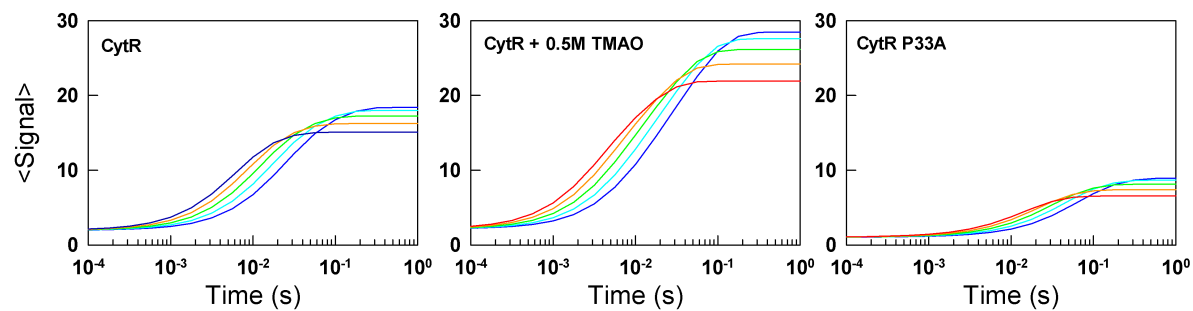

**Figure S4** WSME model predictions on the kinetic phases at select temperatures of 283 K (blue), 288 K (cyan), 293 K (green), 298 K (orange) and 303 K (red). Note that in all cases, the amplitude decreases with temperature while the rate increases. The ordering of the overall amplitude is also in agreement with experiments.

**Table T1:** Parameters\* from fits to the experimental far-UV CD data of CytR employing LacR unfolding curve as a reference. The parameters  $a/c$  and  $b/d$  are the intercepts and slopes of the folded ( $F$ ) and unfolded ( $U$ ) linear baselines, respectively, in mean residue ellipticity units (MRE; scaled down by a factor of 1000). 298 K is used as the reference temperature for both the linear baselines.

|                    | $\Delta S_{\text{conf}}$<br>( $\text{J mol}^{-1} \text{K}^{-1}$ )<br>(all residues<br>except position<br>33) | $\Delta S_{\text{conf}}$<br>( $\text{J mol}^{-1} \text{K}^{-1}$ )<br>(for residue 33) | $\xi$<br>( $\text{J mol}^{-1}$ ) | $\Delta C_p^{\text{cont}}$<br>( $\text{J mol}^{-1} \text{K}^{-1}$ ) | $a$   | $b$  | $c$   | $d$   |
|--------------------|--------------------------------------------------------------------------------------------------------------|---------------------------------------------------------------------------------------|----------------------------------|---------------------------------------------------------------------|-------|------|-------|-------|
| <b>CytR</b>        | -34.0                                                                                                        | 0                                                                                     | -213.0                           | -2.1                                                                | -15.3 | 0.03 | -1.65 | -0.04 |
| <b>CytR + TMAO</b> | -34.0                                                                                                        | 0                                                                                     | -216.1                           | -2.1                                                                | -15.3 | 0.03 | -1.65 | -0.04 |
| <b>CytR P33A</b>   | -34.0                                                                                                        | -34.0                                                                                 | -213.0                           | -2.1                                                                | -15.3 | 0.03 | -1.65 | -0.04 |

\*  $\Delta S_{\text{conf}}$  is the entropic penalty for fixing a residue in native conformation.  $\xi$  is the van der Waals interaction energy per native contact (derived from a 5 Å heavy-atom cut-off radius and including nearest neighbor interactions).  $\Delta C_p^{\text{cont}}$  is the heat-capacity change per native contact.

## References

1. Munshi, S., Gopi, S., Subramanian, S., Campos, L.A. & Naganathan, A.N. Protein plasticity driven by disorder and collapse governs the heterogeneous binding of CytR to DNA. *Nuc. Acids Res.*, DOI: 10.1093/nar/gky176 (2018).
2. Wako, H. & Saito, N. Statistical Mechanical Theory of Protein Conformation .2. Folding Pathway for Protein. *J. Phys. Soc. Japan* **44**, 1939-1945 (1978).
3. Muñoz, V. & Eaton, W.A. A simple model for calculating the kinetics of protein folding from three-dimensional structures. *Proc. Natl. Acad. Sci. U.S.A.* **96**, 11311-11316 (1999).
4. Naganathan, A.N. Predictions from an Ising-like Statistical Mechanical Model on the Dynamic and Thermodynamic Effects of Protein Surface Electrostatics. *J. Chem. Theory Comput.* **8**, 4646-4656 (2012).
5. Naganathan, A.N. A Rapid, Ensemble and Free Energy Based Method for Engineering Protein Stabilities. *J. Phys. Chem. B* **117**, 4956-4964 (2013).
6. Naganathan, A.N., Sanchez-Ruiz, J.M., Munshi, S. & Suresh, S. Are Protein Folding Intermediates the Evolutionary Consequence of Functional Constraints? *J. Phys. Chem. B* **119**, 1323-1333 (2015).
7. Rajasekaran, N., Gopi, S., Narayan, A. & Naganathan, A.N. Quantifying Protein Disorder through Measures of Excess Conformational Entropy. *J. Phys. Chem. B* **120**, 4341-4350 (2016).
8. Naganathan, A.N. & Orozco, M. The conformational landscape of an intrinsically disordered DNA-binding domain of a transcription regulator. *J. Phys. Chem. B* **117**, 13842-13850 (2013).
